# Supplementary material for: Development of Random Forest Algorithm Based Prediction Model of Alzheimer’s Disease Using Neurodegeneration Pattern
Source: PubMed Central journal article supplement — Psychiatry Investig. 2021 Jan 25;18(1):69–79. doi: 10.30773/pi.2020.0304 (PMC7897872; doi:10.30773/pi.2020.0304), 2021-01-25
Supplement: pi-2020-0304-suppl1.pdf [file pi-2020-0304-suppl1.pdf]

## SUPPLEMENTARY MATERIALS

### Deep learning-based segmentation method

We performed the Desikan-Killiany atlas-based freesurfer segmentation on 388 patients of Yeouido St. Mary's Hospital dataset as well as public datasets such as HCP, ADNI, PPMI, AIBL, and IXI, and two expert performed manual correction to produced fine-tuned ground truth dataset. In addition, hypo-intensity region was added. The dataset was separated into three sets: training, validation, and testing. We first randomly shuffled the dataset and separated 49 patients for testing. The remaining patient's data were used for training and validation (9.5:0.5). The training data was constructed by extracting the three-dimension patch image using uniform sampling ( $96 \times 96 \times 96$ ) for the individual ground truth data (Figure 1).

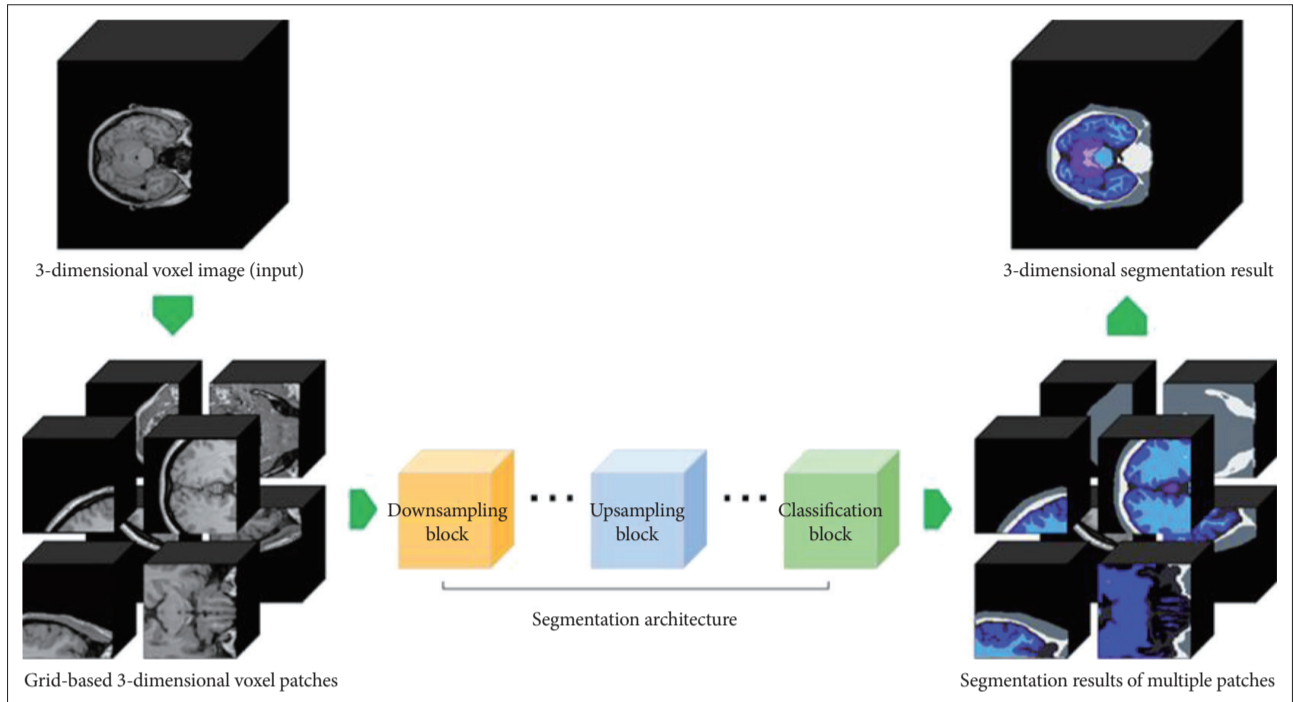

**Figure 1.** Three-dimension patch-based training.

We improved the UNet++ deep learning architecture with a three-dimension methodology to train about 104 labels. This algorithm has a convolutional layer in the skip path, which bridges the semantic gap between the encoder and decoder characteristic maps. There is a dense skip-connection in the skip path, which improves the gradient flow, has a deep supervision, which enables model pruning, improves performance, or at worst compares to using only one lossy layer. Performance can be achieved (Figure 2).

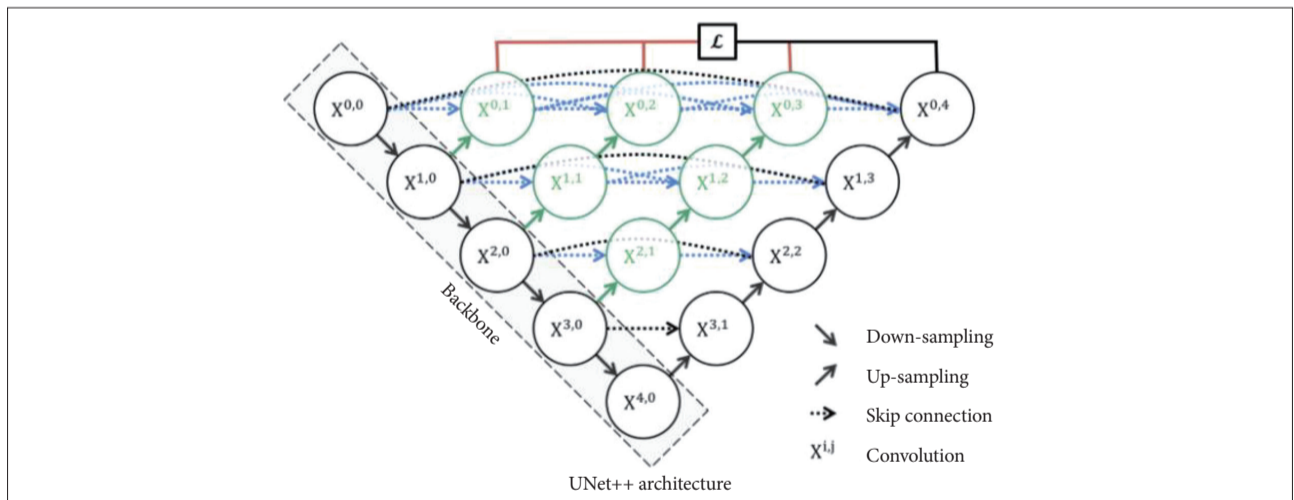

**Figure 2.** U-Net++ deep learning architecture.

Because the voxel by voxel segmentation learning method is used, the CrossEntropy loss function is used, and the learning rate for Adam optimizer is 0.0001. The total number of iterations is 300,000. Segmentation results are obtained by merging inference data using a three-dimension patch sliding aggregator. Figure 3 shows the segmentation result of brain sub-volumes.

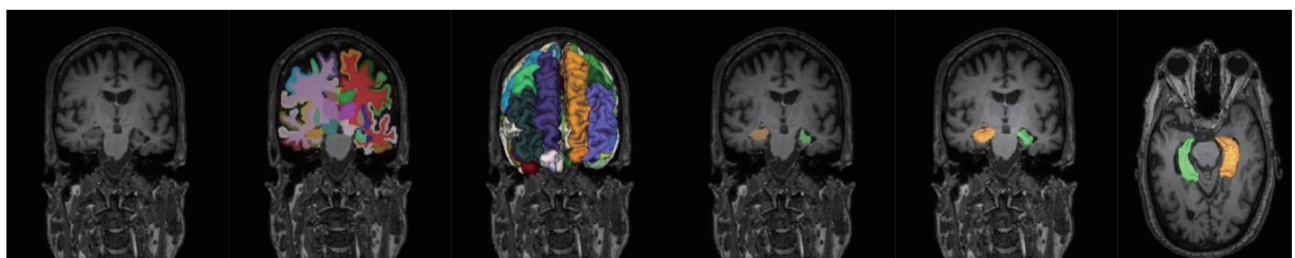

**Figure 3.** Deep learning-based segmentation result.

We perform the Dice overlap with the extra-validation set and, the average Dice coefficient is  $0.840 \pm 0.083$ . Table 1 shows the whole Dice coefficients with the test set.

**Table 1.** Dice overlap result with the test set (49 case)

| Case     | Average dice 106 labels |
|----------|-------------------------|
| 0        | 0.706±0.262             |
| 1        | 0.791±0.186             |
| 2        | 0.866±0.085             |
| 3        | 0.873±0.067             |
| 4        | 0.857±0.068             |
| 5        | 0.877±0.066             |
| 6        | 0.822±0.100             |
| 7        | 0.857±0.070             |
| 8        | 0.856±0.072             |
| 9        | 0.765±0.113             |
| 10       | 0.768±0.099             |
| 11       | 0.766±0.108             |
| 12       | 0.779±0.088             |
| 13       | 0.758±0.106             |
| 14       | 0.829±0.098             |
| 15       | 0.886±0.052             |
| 16       | 0.874±0.053             |
| 17       | 0.886±0.057             |
| 18       | 0.853±0.084             |
| 19       | 0.873±0.065             |
| 20       | 0.876±0.063             |
| 21       | 0.875±0.068             |
| 22       | 0.876±0.061             |
| 23       | 0.877±0.060             |
| 24       | 0.872±0.061             |
| 25       | 0.881±0.058             |
| 26       | 0.863±0.102             |
| 27       | 0.871±0.071             |
| 28       | 0.883±0.058             |
| 29       | 0.84±0.075              |
| 30       | 0.861±0.064             |
| 31       | 0.825±0.067             |
| 32       | 0.837±0.097             |
| 33       | 0.851±0.080             |
| 34       | 0.839±0.097             |
| 35       | 0.822±0.103             |
| 36       | 0.867±0.065             |
| 37       | 0.865±0.060             |
| 38       | 0.794±0.101             |
| 39       | 0.758±0.109             |
| 40       | 0.864±0.060             |
| 41       | 0.789±0.089             |
| 42       | 0.878±0.059             |
| 43       | 0.883±0.060             |
| 44       | 0.752±0.102             |
| 45       | 0.855±0.092             |
| 46       | 0.859±0.069             |
| 47       | 0.863±0.064             |
| 48       | 0.854±0.059             |
| Mean±std | 0.840±0.083             |
